# Supplementary material for: Identifying prognostic biomarkers based on aberrant DNA methylation in kidney renal clear cell carcinoma
Source: PubMed Central journal article supplement (PMC5354907; doi:10.18632/oncotarget.14134), 2016-12-24
Supplement: oncotarget-08-5268-s001.pdf [file oncotarget-08-5268-s001.pdf]

## **Identifying prognostic biomarkers based on aberrant DNA methylation in kidney renal clear cell carcinoma**

### **SUPPLEMENTARY TABLES**

#### **Supplementary Table S1: Subpathways enriched by differentially methylated genes**

See Supplementary File 1

#### **Supplementary Table S2: Subpathways enriched by differentially expressed genes**

See Supplementary File 2

#### **Supplementary Table S3: subpathways under the regulation of both DMGs and DEGs**

See Supplementary File 3
